# Supplementary material
Source: publisher site journal article supplement (https://www.spandidos-publications.com/2174/downloadSupplementary)
Supplement: Supplementary file 1 [file downloadSupplementary]

## Sheet: Sheet1
Table SI. Differentially expressed lncRNAs (n=353) identified in degenerated nucleus pulposus cells. LncRNA, long non-coding RNA.
LncRNA	P-value	Fold-change	Fold-change (absolute)	Regulation	Source
NR_026812	0.0257326	25.5311	25.5311	up	RefSeq
ENST00000438158	0.000973372	21.9566	21.9566	up	ENSEMBL_GENCODE
NR_122111	0.00312833	15.4068	15.4068	up	RefSeq
ENST00000454588	0.00687166	12.7231	12.7231	up	ENSEMBL_GENCODE
lnc-HRK-2:1	0.000888655	10.0848	10.0848	up	lncipedia
lnc-MFAP5-3:2	0.0352691	9.78231	9.78231	up	lncipedia
NR_031707	0.0467231	9.43331	9.43331	up	RefSeq
NR_105061	0.00311417	9.38211	9.38211	up	RefSeq
lnc-ST8SIA5-1:2	0.0072782	7.80364	7.80364	up	lncipedia
lnc-HFE2-2:1	0.048632	7.48226	7.48226	up	lncipedia
ENST00000608286	0.0240904	7.47045	7.47045	up	ENSEMBL_GENCODE
ENST00000458422	0.0126596	6.83298	6.83298	up	ENSEMBL_GENCODE
NR_038236	0.0394384	6.8327	6.8327	up	RefSeq
lnc-IGSF11-5:1	0.020282	6.60207	6.60207	up	lncipedia
lnc-SERPINI1-19:1	0.0225694	6.47048	6.47048	up	lncipedia
lnc-RP11-422N16.3.1-5:1	0.044175	6.10507	6.10507	up	lncipedia
NR_130704	0.0462754	5.62668	5.62668	up	RefSeq
NONHSAT081552	0.046132	5.61565	5.61565	up	NONCODE
NR_038939	0.00207028	5.16278	5.16278	up	RefSeq
lnc-C22orf43-1:25	0.0321055	4.24563	4.24563	up	lncipedia
NR_027436	0.0273964	4.18735	4.18735	up	RefSeq
lnc-PPIAL4G-18:1	0.0354202	4.15565	4.15565	up	lncipedia
lnc-ZNF729-4:1	0.0253807	4.15529	4.15529	up	lncipedia
lnc-LRRD1-3:1	0.00219318	4.05382	4.05382	up	lncipedia
lnc-DNAJC19-6:1	0.0181173	4.00507	4.00507	up	lncipedia
lnc-MUC19-2:1	0.0374685	3.89569	3.89569	up	lncipedia
lnc-PLXDC2-3:1	0.00545965	3.89298	3.89298	up	lncipedia
ENST00000451762	0.00454211	3.87369	3.87369	up	ENSEMBL_GENCODE
NR_120684	0.0332728	3.85502	3.85502	up	RefSeq
ENST00000490375	0.0368192	3.81836	3.81836	up	ENSEMBL_GENCODE
lnc-MAP9-11:1	0.0311766	3.77809	3.77809	up	lncipedia
lnc-FRMD4B-5:1	0.00795621	3.75345	3.75345	up	lncipedia
NR_001564	0.0192582	3.63828	3.63828	up	RefSeq
ENST00000624444	0.0282086	3.48166	3.48166	up	ENSEMBL_GENCODE
lnc-IMP4-7:1	0.0344486	3.47298	3.47298	up	lncipedia
lnc-VAV3-3:1	0.0242213	3.42486	3.42486	up	lncipedia
lnc-RP1-177G6.2.1-3:4	0.0208159	3.41962	3.41962	up	lncipedia
NR_044994	0.00532283	3.4186	3.4186	up	RefSeq
ENST00000457976	0.049148	3.40466	3.40466	up	ENSEMBL_GENCODE
lnc-CD96-4:1	0.00948829	3.35335	3.35335	up	lncipedia
lnc-C2orf89-6:1	0.0128915	3.3121	3.3121	up	lncipedia
NONHSAT118053	0.0481467	3.26307	3.26307	up	NONCODE
NR_029435	0.0140091	3.25452	3.25452	up	RefSeq
cdr1-as_homosapiens_1	0.0177478	3.24832	3.24832	up	lncRNAdb
lnc-FAM46C-2:1	0.0395065	3.21992	3.21992	up	lncipedia
lnc-AMDHD2-3:1	0.0442287	3.14743	3.14743	up	lncipedia
lnc-KIF23-3:2	0.0145042	3.14231	3.14231	up	lncipedia
lnc-PRKAB2-5:1	0.0230529	3.13681	3.13681	up	lncipedia
ENST00000606743	0.0122374	3.13549	3.13549	up	ENSEMBL_GENCODE
ENST00000518014	0.0371684	3.12491	3.12491	up	ENSEMBL_GENCODE
lnc-HNRNPA2B1-5:1	0.032546	3.12477	3.12477	up	lncipedia
lnc-ZC3H12B-16:1	0.0383675	3.05933	3.05933	up	lncipedia
NR_036470	0.0472512	3.055	3.055	up	RefSeq
lnc-AC073263.1-2:6	0.021622	3.0313	3.0313	up	lncipedia
ENST00000621046	0.00967876	2.98631	2.98631	up	ENSEMBL_GENCODE
ENST00000364819	0.0270618	2.98379	2.98379	up	ENSEMBL_GENCODE
ENST00000482985	0.0255297	2.94841	2.94841	up	ENSEMBL_GENCODE
lnc-XYLT1-4:1	0.0112644	2.94582	2.94582	up	lncipedia
ENST00000608314	0.0227584	2.90811	2.90811	up	ENSEMBL_GENCODE
ENST00000524062	0.0385126	2.88983	2.88983	up	ENSEMBL_GENCODE
lnc-PPIAL4G-17:1	0.0355517	2.86088	2.86088	up	lncipedia
lnc-MYOC-6:1	0.0407109	2.82637	2.82637	up	lncipedia
lnc-OR52B4-2:1	0.0455532	2.81344	2.81344	up	lncipedia
lnc-CASK-7:1	0.0190081	2.78227	2.78227	up	lncipedia
lnc-AP000350.10.1-2:3	0.0397514	2.77369	2.77369	up	lncipedia
ENST00000606582	0.00633577	2.7735	2.7735	up	ENSEMBL_GENCODE
lnc-RNF111-2:1	0.0329842	2.75379	2.75379	up	lncipedia
ENST00000412811	0.0154001	2.73224	2.73224	up	ENSEMBL_GENCODE
NONHSAT039823	0.00668915	2.71297	2.71297	up	NONCODE
lnc-SLC38A1-6:1	0.0450209	2.6965	2.6965	up	lncipedia
lnc-HDAC9-1:2	0.00911986	2.67111	2.67111	up	lncipedia
NR_027466	0.0465457	2.65646	2.65646	up	RefSeq
lnc-DFNA5-4:1	0.0263627	2.65537	2.65537	up	lncipedia
lnc-GALK2-3:2	0.0492649	2.64956	2.64956	up	lncipedia
lnc-TLE1-8:1	0.0345784	2.63538	2.63538	up	lncipedia
NR_036507	0.0193395	2.55861	2.55861	up	RefSeq
lnc-VPS54-5:1	0.0176131	2.55418	2.55418	up	lncipedia
lnc-STK4-1:1	0.0440492	2.54786	2.54786	up	lncipedia
NONHSAT135778	0.0436349	2.51901	2.51901	up	NONCODE
lnc-DRGX-3:1	0.00423138	2.51166	2.51166	up	lncipedia
lnc-ORMDL1-4:1	0.0272661	2.4949	2.4949	up	lncipedia
lnc-CAT-1:1	0.0477049	2.4754	2.4754	up	lncipedia
lnc-SERF1A-1:2	0.0165951	2.44644	2.44644	up	lncipedia
lnc-MTRNR2L10-3:1	0.0396858	2.4456	2.4456	up	lncipedia
lnc-FAM75B-3:1	0.0355952	2.43546	2.43546	up	lncipedia
ENST00000601369	0.00676048	2.43496	2.43496	up	ENSEMBL_GENCODE
ENST00000613366	0.0109372	2.42741	2.42741	up	ENSEMBL_GENCODE
lnc-RP3-377D14.1.1-19:1	0.044397	2.39643	2.39643	up	lncipedia
lnc-RP1-239B22.1.1-2:1	0.0305639	2.39054	2.39054	up	lncipedia
lnc-MZT2A-9:1	0.0180977	2.34995	2.34995	up	lncipedia
lnc-PPM1J-1:1	0.01128	2.34131	2.34131	up	lncipedia
NR_037144	0.0326707	2.3235	2.3235	up	RefSeq
lnc-RAB33B-6:1	0.0453824	2.32214	2.32214	up	lncipedia
lnc-FAM72C-2:1	0.0145991	2.31383	2.31383	up	lncipedia
lnc-GPR149-5:1	0.0294631	2.31305	2.31305	up	lncipedia
lnc-C6orf97-1:1	0.00126943	2.27335	2.27335	up	lncipedia
lnc-MRP63-5:5	0.000653868	2.26761	2.26761	up	lncipedia
lnc-RNF14-3:1	0.0163593	2.24106	2.24106	up	lncipedia
lnc-FAM175A-2:1	0.0477768	2.23886	2.23886	up	lncipedia
lnc-AC145676.2.1-7:1	0.00614283	2.23521	2.23521	up	lncipedia
lnc-C5orf55-3:1	0.0265141	2.22684	2.22684	up	lncipedia
lnc-ANTXRL-3:1	0.0330328	2.22119	2.22119	up	lncipedia
NR_024399	0.0198814	2.20683	2.20683	up	RefSeq
ENST00000507241	0.0442528	2.19162	2.19162	up	ENSEMBL_GENCODE
NONHSAT135777	0.0154727	2.17809	2.17809	up	NONCODE
NONHSAT135776	0.0129247	2.17636	2.17636	up	NONCODE
lnc-MRPS30-7:1	0.0453447	2.17181	2.17181	up	lncipedia
ENST00000421068	0.0241401	2.16703	2.16703	up	ENSEMBL_GENCODE
ENST00000432518	0.0250341	2.16233	2.16233	up	ENSEMBL_GENCODE
lnc-GATM-5:1	0.0316564	2.16154	2.16154	up	lncipedia
lnc-FAM72B-10:2	0.0374946	2.13924	2.13924	up	lncipedia
NONHSAT016687	0.0432692	2.13498	2.13498	up	NONCODE
NR_120592	0.0140018	2.13027	2.13027	up	RefSeq
lnc-OR2D2-1:1	0.0108381	2.119	2.119	up	lncipedia
ENST00000578974	0.0116426	2.10884	2.10884	up	ENSEMBL_GENCODE
lnc-RSPO2-2:1	0.0339487	2.08715	2.08715	up	lncipedia
lnc-EHF-6:1	0.0263025	2.07039	2.07039	up	lncipedia
lnc-MAP3K13-5:1	0.00471828	2.055	2.055	up	lncipedia
lnc-LSM14A-3:1	0.0419718	2.03132	2.03132	up	lncipedia
lnc-CSMD1-10:1	0.0367088	2.02996	2.02996	up	lncipedia
lnc-IMPG2-3:1	0.0423225	2.02782	2.02782	up	lncipedia
lnc-CEBPD-3:1	0.0486218	2.02039	2.02039	up	lncipedia
NR_002830	0.0405167	2.01967	2.01967	up	RefSeq
ENST00000412712	0.0209016	2.01435	2.01435	up	ENSEMBL_GENCODE
lnc-ANTXRL-4:1	0.00465748	2.00465	2.00465	up	lncipedia
ENST00000421297	0.0310654	0.499893	2.00043	down	ENSEMBL_GENCODE
lnc-UBE2QL1-2:1	0.0431474	0.498354	2.0066	down	lncipedia
lnc-EXD2-7:1	0.0222408	0.495836	2.0168	down	lncipedia
lnc-TRMU-1:2	0.0449264	0.494859	2.02078	down	lncipedia
NR_046452	0.0313359	0.493628	2.02582	down	RefSeq
NONHSAT118052	0.00994286	0.492142	2.03193	down	NONCODE
lnc-FRMD4A-6:1	0.0479497	0.490707	2.03787	down	lncipedia
ENST00000623424	0.0438795	0.488912	2.04536	down	ENSEMBL_GENCODE
lnc-CAMSAP2-4:1	0.0419676	0.488282	2.048	down	lncipedia
ENST00000621642	0.0485248	0.484859	2.06245	down	ENSEMBL_GENCODE
lnc-KCNK6-2:3	0.0168142	0.483683	2.06747	down	lncipedia
NR_120562	0.0304105	0.48277	2.07138	down	RefSeq
lnc-SNX32-1:7	0.00498882	0.481834	2.0754	down	lncipedia
ENST00000621809	0.0436298	0.478181	2.09126	down	ENSEMBL_GENCODE
lnc-H2AFZ-1:4	0.0437785	0.477757	2.09311	down	lncipedia
lnc-EFNB1-3:1	0.0426648	0.476233	2.09981	down	lncipedia
lnc-PALMD-1:1	0.0248345	0.473998	2.10971	down	lncipedia
NR_023383	0.00362511	0.473408	2.11234	down	RefSeq
NR_104606	0.0492942	0.472437	2.11668	down	RefSeq
lnc-UNC45A-2:1	0.0471515	0.470891	2.12363	down	lncipedia
lnc-IGF2-AS-2:1	0.0363925	0.470857	2.12379	down	lncipedia
lnc-TRPV2-4:1	0.0377268	0.470189	2.1268	down	lncipedia
NONHSAT054086	0.0354943	0.467604	2.13856	down	NONCODE
ENST00000362058	0.0101426	0.466107	2.14543	down	ENSEMBL_GENCODE
NR_106994	0.0385692	0.466093	2.1455	down	RefSeq
lnc-HLX-4:1	0.031215	0.465278	2.14925	down	lncipedia
NONHSAT006636	0.0394941	0.464301	2.15378	down	NONCODE
NONHSAT117394	0.00582524	0.463905	2.15562	down	NONCODE
lnc-ACOT12-1:8	0.0420207	0.462497	2.16218	down	lncipedia
lnc-NNMT-2:1	0.0153328	0.457458	2.18599	down	lncipedia
NR_026583	0.0433914	0.456086	2.19257	down	RefSeq
ENST00000434227	0.0281644	0.454222	2.20157	down	ENSEMBL_GENCODE
lnc-ZNF716-10:4	0.0324657	0.453706	2.20407	down	lncipedia
lnc-C5orf45-1:2	0.0464753	0.452357	2.21064	down	lncipedia
lnc-FOXB2-7:1	0.0425544	0.452189	2.21147	down	lncipedia
lnc-PITRM1-10:1	0.0491463	0.450845	2.21805	down	lncipedia
NR_027278	0.0159179	0.44987	2.22287	down	RefSeq
lnc-IPO5-9:1	0.0480691	0.448885	2.22774	down	lncipedia
NONHSAT116907	0.023601	0.448367	2.23032	down	NONCODE
ENST00000582263	0.0260431	0.440012	2.27267	down	ENSEMBL_GENCODE
NR_045680	0.00285534	0.437714	2.2846	down	RefSeq
lnc-HLA-A-7:2	0.0154729	0.436747	2.28966	down	lncipedia
ENST00000531701	0.0129744	0.435246	2.29755	down	ENSEMBL_GENCODE
lnc-D2HGDH-1:1	0.0342576	0.430485	2.32296	down	lncipedia
lnc-LYPD6-7:1	0.0411324	0.429371	2.32899	down	lncipedia
ENST00000587826	0.0388201	0.429221	2.3298	down	ENSEMBL_GENCODE
lnc-ARRDC4-8:1	0.0329041	0.42887	2.33171	down	lncipedia
NR_045409	0.0109299	0.428332	2.33464	down	RefSeq
ENST00000543624	0.0467817	0.424898	2.3535	down	ENSEMBL_GENCODE
lnc-PTCD2-4:1	0.00303812	0.424388	2.35633	down	lncipedia
lnc-SOST-1:1	0.0449821	0.423949	2.35877	down	lncipedia
NR_046756	0.00406864	0.420678	2.37711	down	RefSeq
lnc-MRPS28-3:15	0.00558006	0.420079	2.38051	down	lncipedia
NONHSAT054105	0.0263707	0.42003	2.38078	down	NONCODE
lnc-SPINT2-1:3	0.0107595	0.419763	2.38229	down	lncipedia
lnc-HNRPLL-4:1	0.022545	0.419076	2.3862	down	lncipedia
NONHSAT147856	0.0249549	0.418073	2.39193	down	NONCODE
lnc-ADCY10-1:1	0.049861	0.417338	2.39614	down	lncipedia
lnc-STH-2:1	0.0172631	0.415571	2.40633	down	lncipedia
lnc-LINC00482-2:3	0.0269635	0.410838	2.43405	down	lncipedia
ENST00000442130	0.0488813	0.408407	2.44854	down	ENSEMBL_GENCODE
NONHSAT117915	0.014515	0.404494	2.47222	down	NONCODE
NR_126007	0.0411577	0.403639	2.47746	down	RefSeq
lnc-TRDMT1-4:1	0.0485659	0.403537	2.47809	down	lncipedia
lnc-ITIH6-1:1	0.0393784	0.403004	2.48136	down	lncipedia
lnc-LRCH1-3:1	0.0313687	0.398475	2.50957	down	lncipedia
lnc-HDGFL1-1:1	0.0357478	0.397522	2.51558	down	lncipedia
NONHSAT116905	0.0108445	0.396023	2.52511	down	NONCODE
ENST00000608985	0.0445177	0.394807	2.53289	down	ENSEMBL_GENCODE
lnc-PTPDC1-4:1	0.0185198	0.393554	2.54095	down	lncipedia
lnc-OSTC-6:1	0.0435047	0.39353	2.5411	down	lncipedia
lnc-WARS-1:1	0.0309496	0.392766	2.54604	down	lncipedia
lnc-PDLIM2-1:1	0.0453989	0.387908	2.57793	down	lncipedia
lnc-KLF11-1:1	0.0329583	0.385379	2.59485	down	lncipedia
ENST00000448786	0.0440161	0.384256	2.60243	down	ENSEMBL_GENCODE
ENST00000542121	0.0401868	0.383842	2.60524	down	ENSEMBL_GENCODE
ENST00000475669	0.000952742	0.383224	2.60944	down	ENSEMBL_GENCODE
ENST00000503167	0.0457558	0.379011	2.63845	down	ENSEMBL_GENCODE
lnc-FKBP1A-1:2	0.020064	0.378655	2.64092	down	lncipedia
ENST00000560994	0.0158276	0.378649	2.64097	down	ENSEMBL_GENCODE
NONHSAT118268	0.0112336	0.378546	2.64169	down	NONCODE
lnc-ZCCHC13-13:1	0.00216044	0.378313	2.64331	down	lncipedia
NONHSAT034252	0.0366421	0.378273	2.64359	down	NONCODE
ENST00000520840	0.0336688	0.377413	2.64961	down	ENSEMBL_GENCODE
lnc-CDRT15-6:1	0.038446	0.376139	2.65859	down	lncipedia
lnc-PTGER4-5:1	0.0373482	0.375798	2.661	down	lncipedia
lnc-TOLLIP-2:1	0.0440654	0.37547	2.66333	down	lncipedia
NR_125426	0.0368284	0.374191	2.67243	down	RefSeq
lnc-SLC1A1-7:1	0.0328885	0.374134	2.67284	down	lncipedia
ENST00000607322	0.0359945	0.372234	2.68648	down	ENSEMBL_GENCODE
NONHSAT108567	0.0111854	0.371168	2.6942	down	NONCODE
lnc-CMBL-6:1	0.00902433	0.369775	2.70434	down	lncipedia
lnc-IRF8-7:1	0.0427421	0.365902	2.73297	down	lncipedia
ENST00000425541	0.0259653	0.365648	2.73487	down	ENSEMBL_GENCODE
ENST00000581155	0.0331707	0.36493	2.74025	down	ENSEMBL_GENCODE
ENST00000390176	0.0430124	0.363843	2.74844	down	ENSEMBL_GENCODE
lnc-IGFLR1-2:1	0.0460877	0.360196	2.77627	down	lncipedia
NONHSAT025952	0.0209089	0.357688	2.79574	down	NONCODE
lnc-MYO18B-1:1	0.0428589	0.357427	2.79778	down	lncipedia
ENST00000586391	0.0228913	0.356338	2.80632	down	ENSEMBL_GENCODE
lnc-GFAP-2:1	0.0339617	0.355239	2.81501	down	lncipedia
lnc-ISG20-1:2	0.0165312	0.354248	2.82288	down	lncipedia
NONHSAT113736	0.0367297	0.351734	2.84306	down	NONCODE
ENST00000582499	0.0326163	0.349507	2.86117	down	ENSEMBL_GENCODE
lnc-GFPT2-1:1	0.0284928	0.348087	2.87285	down	lncipedia
lnc-C4orf42-8:1	0.0155248	0.347478	2.87788	down	lncipedia
ENST00000462717	0.0488669	0.347453	2.87809	down	ENSEMBL_GENCODE
NR_125737	0.0491566	0.342118	2.92297	down	RefSeq
NONHSAT012544	0.0333284	0.341766	2.92598	down	NONCODE
lnc-PHGDH-3:1	0.024477	0.340452	2.93727	down	lncipedia
lnc-RAD23B-17:2	0.0148858	0.338781	2.95176	down	lncipedia
lnc-POT1-4:1	0.0453716	0.333783	2.99596	down	lncipedia
lnc-ASAP3-1:1	0.0303298	0.332759	3.00518	down	lncipedia
lnc-FLVCR2.1-4:1	0.030531	0.331392	3.01757	down	lncipedia
lnc-WIZ-1:1	0.0175966	0.33138	3.01768	down	lncipedia
lnc-C9orf93-1:1	0.0222573	0.330486	3.02585	down	lncipedia
NR_120495	0.0294064	0.328053	3.04829	down	RefSeq
NR_037657	0.0471296	0.328002	3.04876	down	RefSeq
lnc-PTCH1-7:1	0.0451852	0.324911	3.07777	down	lncipedia
lnc-EPHA6-4:1	0.0174037	0.324851	3.07833	down	lncipedia
ENST00000530600	0.0121745	0.323044	3.09555	down	ENSEMBL_GENCODE
lnc-EGLN3-1:1	0.0152822	0.322345	3.10227	down	lncipedia
NR_128719	0.0492831	0.321902	3.10654	down	RefSeq
lnc-MRPL12-4:1	0.0264483	0.321059	3.11469	down	lncipedia
lnc-TK1-2:1	0.0223191	0.319614	3.12877	down	lncipedia
lnc-DYDC1-7:1	0.0331895	0.313065	3.19423	down	lncipedia
ENST00000598787	0.0477289	0.312596	3.19902	down	ENSEMBL_GENCODE
ENST00000523031	0.0434275	0.311124	3.21415	down	ENSEMBL_GENCODE
lnc-GYG2P1-1:1	0.00708095	0.309734	3.22858	down	lncipedia
NR_038286	0.0237197	0.309247	3.23366	down	RefSeq
ENST00000528445	0.0212078	0.307529	3.25173	down	ENSEMBL_GENCODE
lnc-ZNF469-2:2	0.0307729	0.304779	3.28107	down	lncipedia
NONHSAT060782	0.0258118	0.302612	3.30457	down	NONCODE
lnc-STRN3-12:1	0.0261379	0.301653	3.31507	down	lncipedia
lnc-ARHGAP26-7:1	0.0288324	0.298346	3.35181	down	lncipedia
NR_109924	0.00871969	0.295571	3.38328	down	RefSeq
ENST00000617013	0.0217413	0.293389	3.40844	down	ENSEMBL_GENCODE
lnc-MTO1-2:1	0.0421442	0.289224	3.45753	down	lncipedia
lnc-RP1L1-7:1	0.0149119	0.288082	3.47124	down	lncipedia
lnc-GPN2-3:1	0.0269974	0.285913	3.49757	down	lncipedia
NONHSAT133192	0.0477333	0.285722	3.4999	down	NONCODE
lnc-GABRD-1:1	0.0124285	0.284973	3.5091	down	lncipedia
NR_037182	0.0197985	0.281707	3.54979	down	RefSeq
lnc-GLIPR1L1-1:7	0.00907427	0.271931	3.6774	down	lncipedia
lnc-MAP3K9-9:1	0.0273599	0.270037	3.7032	down	lncipedia
ENST00000562814	0.00939528	0.269658	3.70841	down	ENSEMBL_GENCODE
NR_038238	0.0242854	0.269476	3.7109	down	RefSeq
ENST00000441026	0.0364036	0.268078	3.73026	down	ENSEMBL_GENCODE
NR_002734	0.0336139	0.267079	3.74421	down	RefSeq
lnc-PKMYT1-2:1	0.0166266	0.26626	3.75573	down	lncipedia
lnc-PRDX2-3:5	0.0472955	0.264651	3.77856	down	lncipedia
ENST00000483650	0.0496144	0.260865	3.8334	down	ENSEMBL_GENCODE
NR_126326	0.0203081	0.257311	3.88635	down	RefSeq
ENST00000601116	0.00280881	0.25397	3.93747	down	ENSEMBL_GENCODE
NR_037878	0.0423871	0.253627	3.9428	down	RefSeq
ENST00000543656	0.0203288	0.251324	3.97892	down	ENSEMBL_GENCODE
ENST00000498872	0.0386656	0.250607	3.99031	down	ENSEMBL_GENCODE
ENST00000437631	0.00680426	0.249713	4.0046	down	ENSEMBL_GENCODE
lnc-GINS1-7:1	0.024741	0.247282	4.04396	down	lncipedia
lnc-ZNF697-3:1	0.00895116	0.247233	4.04477	down	lncipedia
lnc-TXNDC3-1:1	0.0438639	0.244694	4.08674	down	lncipedia
lnc-P2RX5-3:1	0.009937	0.243405	4.10837	down	lncipedia
lnc-RP11-362K2.2.1-2:1	0.0202371	0.241785	4.13591	down	lncipedia
ENST00000534587	0.0115272	0.240219	4.16286	down	ENSEMBL_GENCODE
NR_106967	0.0496561	0.237598	4.20878	down	RefSeq
lnc-MRE11A-3:2	0.0432686	0.237509	4.21037	down	lncipedia
ENST00000474444	0.0401449	0.23673	4.22422	down	ENSEMBL_GENCODE
NR_126419	0.0442943	0.230945	4.33003	down	RefSeq
lnc-TRIM49L2-1:1	0.00703828	0.229904	4.34965	down	lncipedia
lnc-MTPN-1:1	0.0436258	0.227779	4.39022	down	lncipedia
lnc-CDKN3-2:4	0.039242	0.226282	4.41926	down	lncipedia
lnc-CLDN16-2:3	0.0152241	0.220634	4.53239	down	lncipedia
ENST00000390145	0.00848944	0.217123	4.60569	down	ENSEMBL_GENCODE
NR_026913	0.037971	0.216941	4.60954	down	RefSeq
ENST00000582842	0.0264395	0.215566	4.63894	down	ENSEMBL_GENCODE
ENST00000436672	0.0437293	0.212656	4.70244	down	ENSEMBL_GENCODE
NR_121644	0.0229522	0.208247	4.80198	down	RefSeq
lnc-SULT4A1-4:1	0.0351573	0.207325	4.82335	down	lncipedia
lnc-C9orf172-1:4	0.0419065	0.203572	4.91227	down	lncipedia
lnc-ZNF529-2:3	0.0211492	0.201631	4.95957	down	lncipedia
ENST00000559600	0.0403033	0.19875	5.03144	down	ENSEMBL_GENCODE
lnc-WWC2-5:2	0.0443148	0.198444	5.03921	down	lncipedia
lnc-MECR-3:1	0.0302758	0.192476	5.19545	down	lncipedia
lnc-EPGN-4:3	0.0365578	0.191772	5.21453	down	lncipedia
NR_045387	0.0123551	0.188517	5.30457	down	RefSeq
NR_028510	0.0352119	0.181459	5.51088	down	RefSeq
lnc-CFI-3:1	0.0295331	0.176024	5.68104	down	lncipedia
lnc-WAPAL-1:2	0.0444186	0.169765	5.8905	down	lncipedia
ENST00000563727	0.0450776	0.167759	5.96094	down	ENSEMBL_GENCODE
lnc-SRSF5-1:1	0.027847	0.167257	5.97883	down	lncipedia
ENST00000589518	0.0242866	0.153879	6.49863	down	ENSEMBL_GENCODE
lnc-OR2AJ1-1:1	0.0361917	0.152624	6.55204	down	lncipedia
NR_130107	0.0247132	0.151102	6.61804	down	RefSeq
lnc-MARCH7-3:1	0.0446756	0.151094	6.61839	down	lncipedia
lnc-C9orf43-4:2	0.038145	0.149562	6.6862	down	lncipedia
lnc-POTEB-7:1	0.0107953	0.1493	6.69792	down	lncipedia
NR_002161	0.0204811	0.142661	7.00963	down	RefSeq
NONHSAT123775	0.0312439	0.142164	7.03412	down	NONCODE
lnc-AC010997.1-1:1	0.0188698	0.14158	7.06315	down	lncipedia
NR_045129	0.0265412	0.140438	7.12058	down	RefSeq
lnc-BCKDHB-4:1	0.0428726	0.135453	7.38264	down	lncipedia
ENST00000450990	0.0460567	0.135045	7.40491	down	ENSEMBL_GENCODE
lnc-IL19-1:1	0.011619	0.134639	7.42729	down	lncipedia
ENST00000447937	0.00730442	0.123815	8.07655	down	ENSEMBL_GENCODE
NR_125736	0.025754	0.123076	8.12509	down	RefSeq
NONHSAT100361	0.0462029	0.119765	8.34969	down	NONCODE
ENST00000458568	0.00873574	0.116812	8.56077	down	ENSEMBL_GENCODE
NR_122033	0.0226713	0.114471	8.73583	down	RefSeq
lnc-ZNF33A-4:3	0.0222393	0.113521	8.80897	down	lncipedia
lnc-DHX38-3:3	0.00514746	0.112623	8.87921	down	lncipedia
lnc-NKD2-3:8	0.0174521	0.10893	9.18025	down	lncipedia
ENST00000414875	0.0103715	0.108082	9.25219	down	ENSEMBL_GENCODE
lnc-MOB3C-1:1	0.0113558	0.104553	9.56455	down	lncipedia
NONHSAT100360	0.0175288	0.104442	9.57468	down	NONCODE
ENST00000594169	0.00971505	0.102762	9.73122	down	ENSEMBL_GENCODE
lnc-AL901608.1-58:1	0.0109246	0.101946	9.80909	down	lncipedia
NR_046655	0.0129074	0.100905	9.91035	down	RefSeq
ENST00000624840	0.0477341	0.0976215	10.2436	down	ENSEMBL_GENCODE
NR_125920	0.0202088	0.0952392	10.4999	down	RefSeq
lnc-MT1G-2:3	0.0045062	0.0819012	12.2098	down	lncipedia
lnc-HOXD3-1:6	0.0281898	0.0769386	12.9974	down	lncipedia
lnc-TUBB2A-5:1	0.027858	0.0717014	13.9467	down	lncipedia
ENST00000518064	0.0108733	0.0691325	14.465	down	ENSEMBL_GENCODE
lnc-RP11-383H13.1.1-4:1	0.039128	0.060597	16.5025	down	lncipedia
lnc-TMEM229B-2:1	0.00428121	0.059048	16.9354	down	lncipedia
lnc-GABRE-2:1	0.0332942	0.0572808	17.4578	down	lncipedia
NR_026576	0.0131499	0.0487897	20.4961	down	RefSeq
ENST00000438810	0.0139483	0.0386349	25.8833	down	ENSEMBL_GENCODE
